# Supplementary material for: The C3a Anaphylatoxin Receptor Is a Key Mediator of Insulin Resistance and Functions by Modulating Adipose Tissue Macrophage Infiltration and Activation
Source: PubMed Central journal article supplement — Diabetes. 2009 Jul 6;58(9):2006–17. doi: 10.2337/db09-0323 (PMC2731537; doi:10.2337/db09-0323), 2009-07-06

**Figure S1. C3aR mRNA expression in mouse tissues (C57BL6; normal diet).** Total RNA was extracted from tissues and C3aR expression examined by semi-quantitative RT-PCR. Hypoxanthine-guanine phosphoribosyltransferase (HPRT) was used as a loading control, increasing amount of mouse genomic DNA as a positive control and water as a negative control. PCR products were resolved on agarose gel and visualized by UV shadowing after ethidium bromide staining.

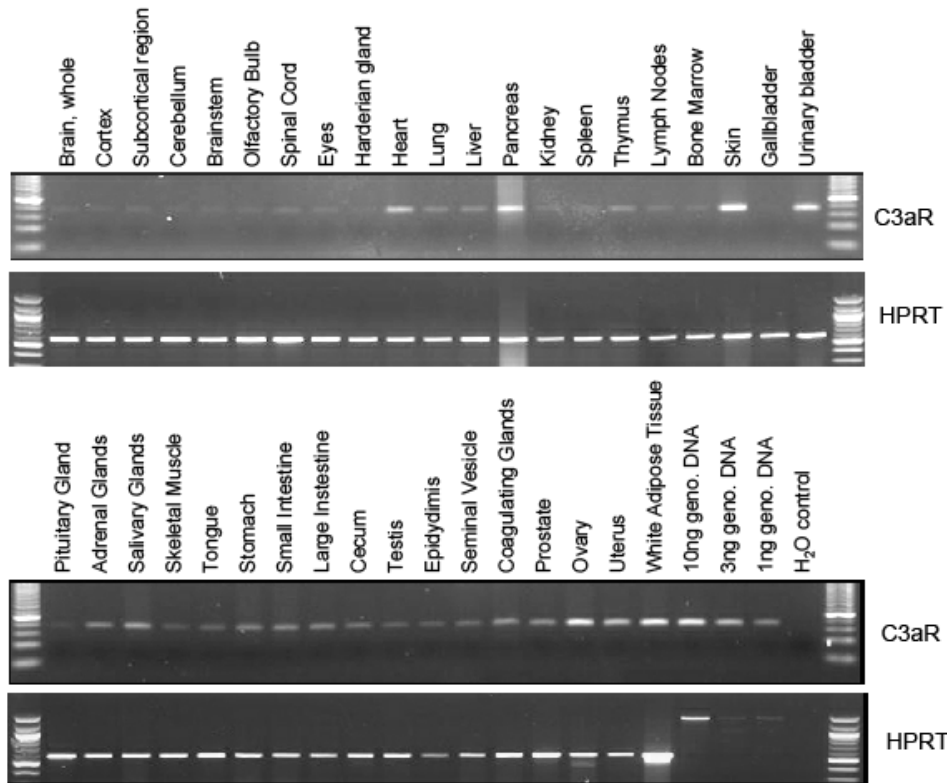

**Figure S2. Relative C3aR mRNA expression normalized to eWAT ND.** Total RNA was extracted from various tissues from lean (n=10) and obese mice (n=10, 8-16 weeks on HFD). Quantitative RT-PCR for C3aR mRNA expression was performed and normalized to cyclophilin B. Each PCR reaction was performed in duplicate.

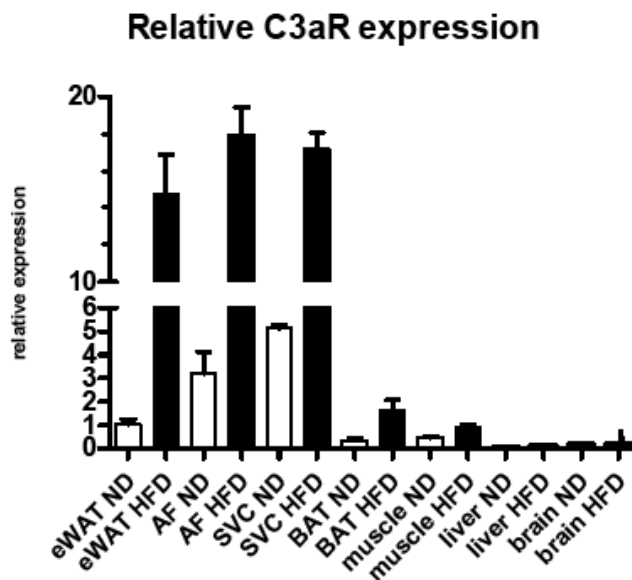

**Figure S3. Generation of the C3aR<sup>-/-</sup> mice.** (A) Schematic representation of the mouse C3aR gene. The C3aR gene is on the reverse strand of mouse chromosome 6. It is composed of 2 exons; exon 1 is a small non-coding exon and exon 2 contains the complete open reading frame, followed by a 3' untranslated region (UTR). The C3aR gene was disrupted by homologous recombination where part of the coding region was deleted (73-270bp) and a LacZ-neo cassette inserted. (B) Genotyping of the knockout mice by PCR using 3 primers (2 primers for the C3aR gene and 1 primer for the LacZ-neo cassette) confirmed proper targeting of the C3aR gene. PCR products were resolved on agarose gel with a 100bp DNA ladder. (C) Quantitative RT-PCR for C3aR mRNA expression in eWAT and muscle from WT and C3aR<sup>+/-</sup> mice (n=6 per group). No C3aR mRNA expression was detected in the C3aR<sup>-/-</sup> tissues (data not shown). All reactions were performed in duplicate. C3aR mRNA expression was normalized to cyclophilin B. \*\*P < 0.01 by unpaired t test.

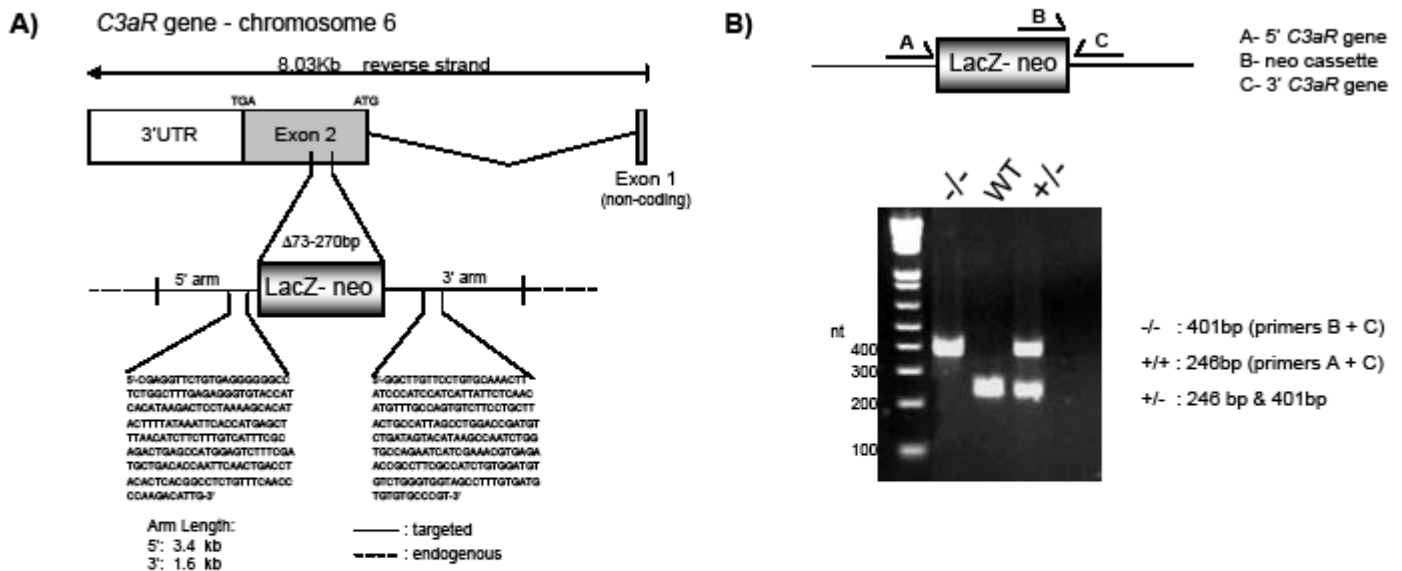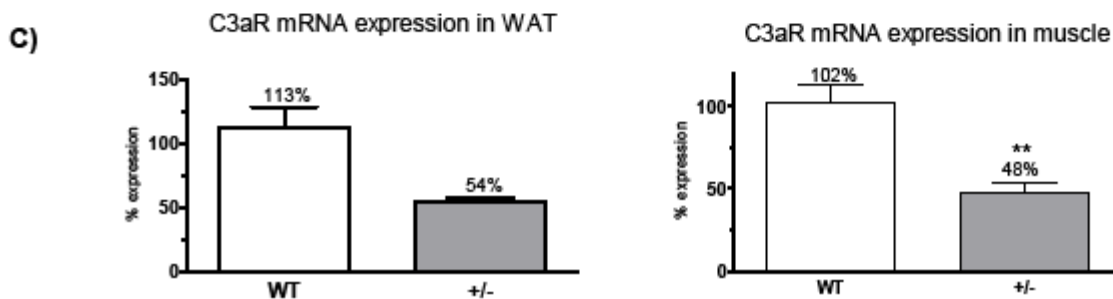

**Figure S4. Plasma cytokine expression in WT and C3aR1<sup>-/-</sup> mice on ND and HFD after 8 weeks HFD.** Plasma expression of MCP-1, IL-6, TNF $\alpha$ , IL-1 $\beta$ , IL-12/ IL-23p40, RANTES, IL-2 and IL-10 was assessed in WT and C3aR<sup>-/-</sup> mice on ND and HFD. Data presented as mean +/- SEM (n = 6 per group). No changes in plasma IL-4 and KC/GRO expression was seen in all 4 groups and plasma GM-CSF and IFN $\gamma$  were below detection limits (data not shown). All measurements were done in triplicate. \*P < 0.05, \*\*P < 0.01, \*\*\*P < 0.001 by ANOVA.

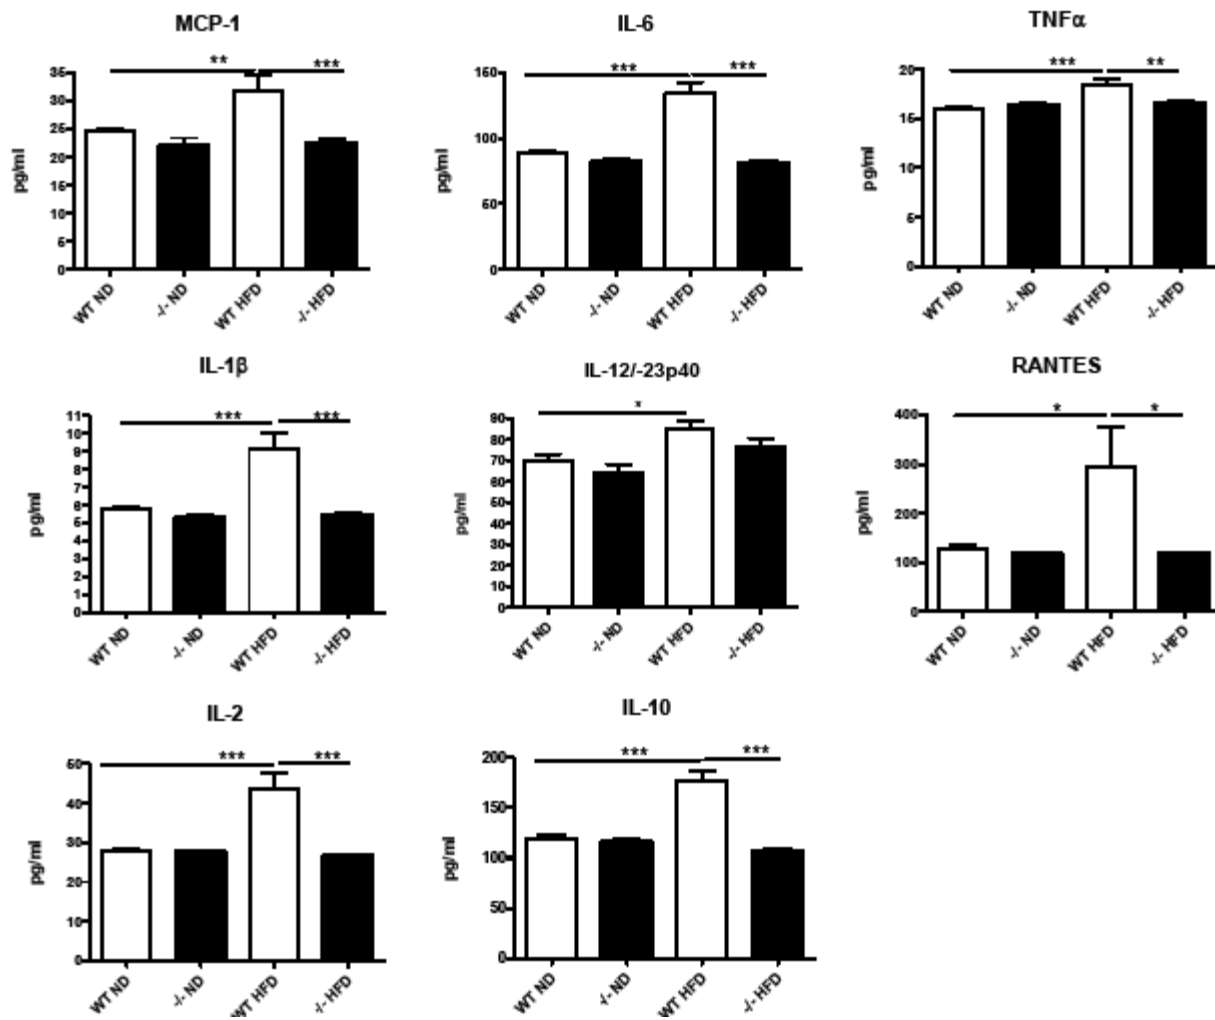

**Figure S5. The effect of C3aR deletion on BMDM functions.** (A) Bone marrow cells from femurs were collected and differentiated for 5 days in the presence of murine M-CSF. Adherent BMDMs from WT, C3aR<sup>+/-</sup> and C3aR<sup>-/-</sup> were untreated (M0), treated with LPS + IFN $\gamma$  (M1 polarization) or IL-4 + IL-13 (M2 polarization) for 2 days (n=6 per condition). Cytokine secretion (IL-1 $\beta$ , IL-6, TNF $\alpha$ , RANTES and MCP-1) was assessed in cell supernatants. No change in KC/GRO and GM-CSF was seen in any of the groups. Furthermore, both IFN $\gamma$  and IL-4 (used for polarization) were detected at similar levels in M1 and M2, respectively (data not shown). (B) RNA was extracted from BMDMs and quantitative RT-PCR performed to assess the expression level of M1- (Nos1, Nos2, Marco) and M2- (MRC2) specific genes. F4/80 expression was also determined in these cells. All measurements were done in duplicate. Data presented as mean  $\pm$  SEM (n = 6 per group). The following probes from Applied Biosystems were used: cyclophilin B: Mm00478295\_m1, F4/80: Mm00802530\_m1, CD68: Mm00839636\_g1, MCP-1/CCL2: Mm00441242\_m1, IL-6: Mm00446190\_m1, Arg2: Mm00477592\_m1, Arg1: Mm00475988\_m1, C3aR: Mm02620006\_s1 and Mm01184110\_m1, Nos1: Mm00435175\_m1, Nos2: Mm00440485\_m1, Marco: Mm00440265\_m1, MRC2: Mm00485184\_m1. \*P < 0.05, \*\*P < 0.01, \*\*\*P < 0.001 by ANOVA.

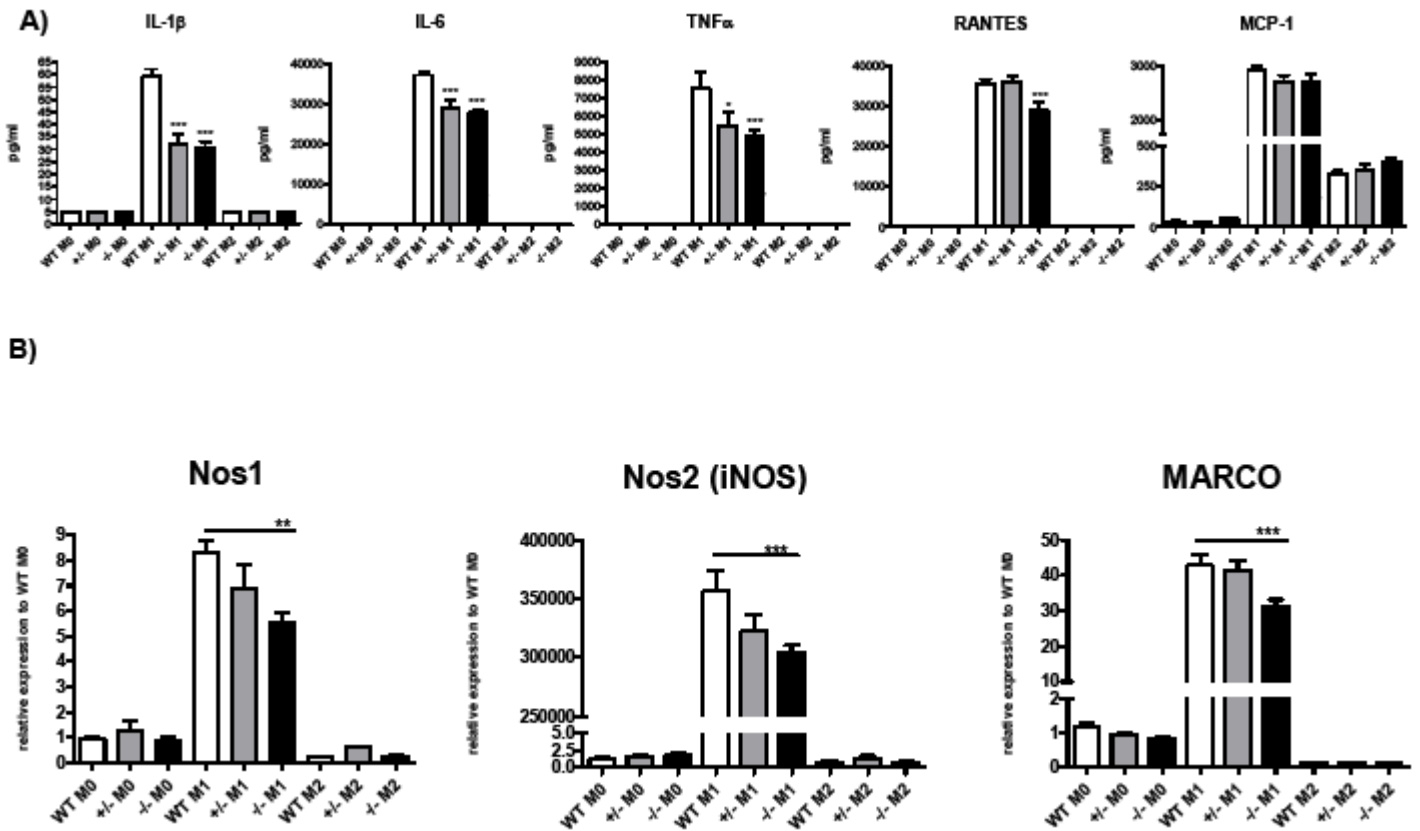

**Figure S6. The effect of C3aR deletion on thioglycollate elicited peritoneal macrophage functions.** Five week old male WT and C3aR<sup>-/-</sup> mice (n=5 per group) were injected with 1ml of a sterile 6% thioglycollate solution in the mouse peritoneal cavity. Four days later, mice were euthanized and cells collected by washing peritoneal cavity. Cells were resuspended in complete media and plated at 5 X 10<sup>5</sup> macrophages/6 well (n=5 per condition). (A) Cells from peritoneal lavages were plated and allowed to adhere for 2hrs. Adherent cells (peritoneal macrophages) from WT and C3aR<sup>-/-</sup> were untreated (M0), treated with LPS + IFN $\gamma$  (M1 polarization) or IL-4 + IL-13 (M2 polarization) for 2 days (n=5 per condition). Cytokine secretion (IL-6, TNF $\alpha$ , RANTES and MCP-1) was assessed in cell supernatants. (B) RNA was extracted from peritoneal macrophages and quantitative RT-PCR performed to assess the expression level of M1- (Nos1, Nos2, Marco) specific genes. All measurements were done in duplicate. Data presented as mean +/- SEM (n = 5 per group). Probes used described in Figure S6 legend. \*P < 0.05, \*\*P < 0.01, \*\*\*P < 0.001 by ANOVA.

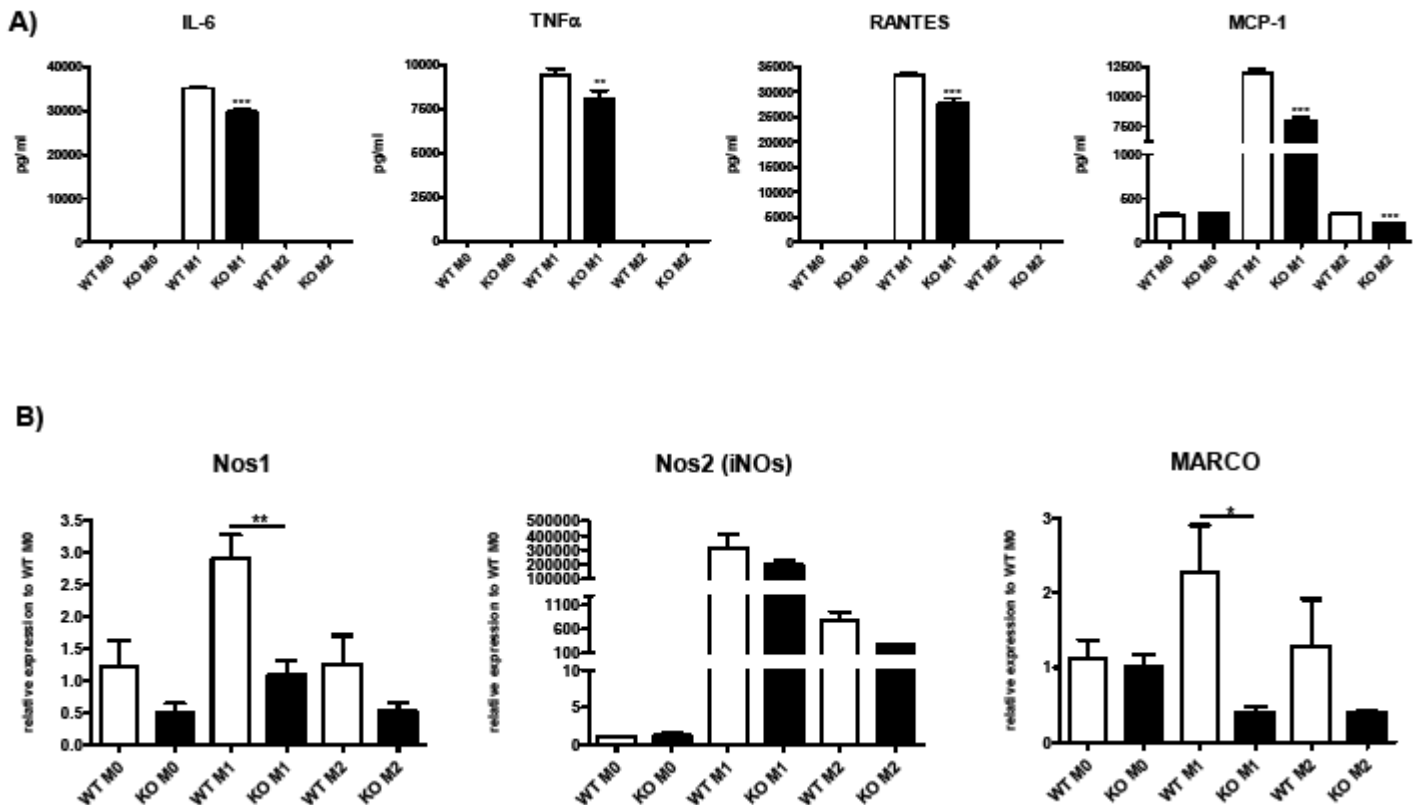

**Figure S7. Body weight and food intake in C3aR<sup>-/-</sup> mice on ND and HFD in a second DIO study.** A second cohorts of C3aR<sup>-/-</sup> and WT mice (n=6 per group) were initially age-matched (5-7 weeks old). Absolute body weight and food intake in grams over the 6 week period was measured.

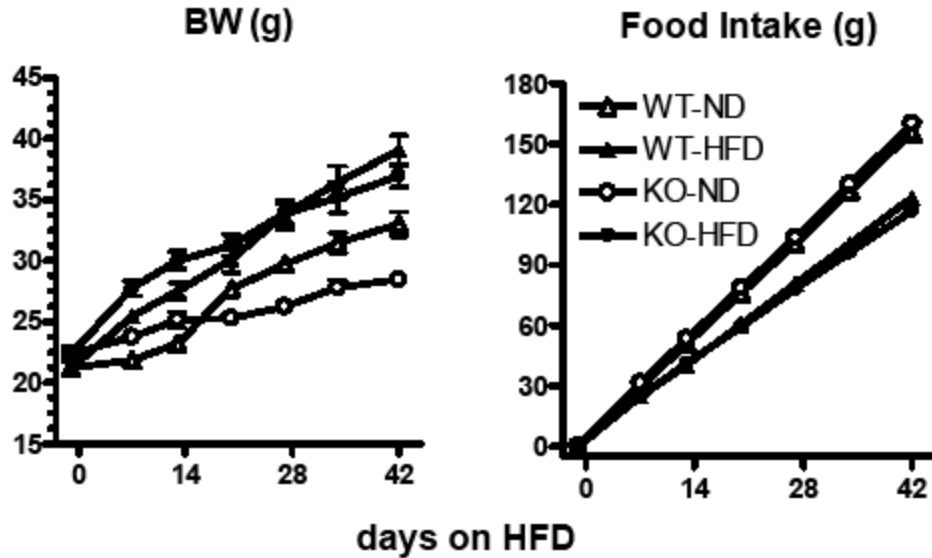

**Figure S8. C3aR mRNA expression in mouse cell lines.** Total RNA was extracted from 3T3-L1 adipocytes, macrophage cell lines (J774, RAW264.7, MHS) and SVC fraction from HFD WAT. Quantitative RT-PCR for C3aR mRNA expression was performed and normalized to cyclophilin B. Each PCR reaction was performed in duplicate.

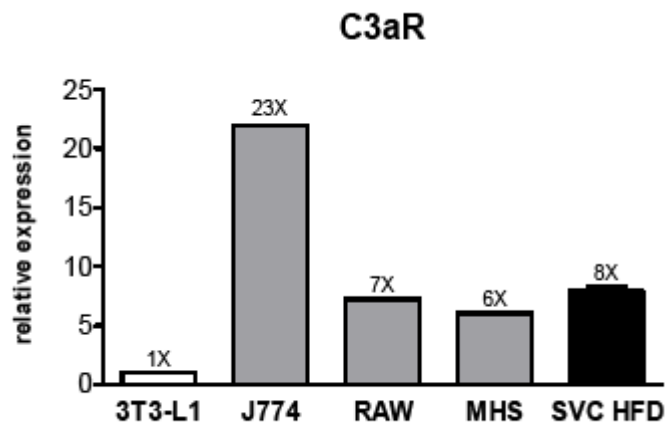

Supplement: supp_db09-0323_db09-0323_Online_appendix.pdf [file supp_db09-0323_db09-0323_Online_appendix.pdf]
